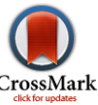

# Correlations between Integrin $\alpha v \beta 6$ Expression and Clinico-Pathological Features in Stage B and Stage C Rectal Cancer

Seong Beom Ahn<sup>1,2</sup>, Abidali Mohamedali<sup>1,2</sup>, Charles Chan<sup>3</sup>, Julie Fletcher<sup>3</sup>, Sun Young Kwun<sup>3</sup>, Candice Clarke<sup>3</sup>, Owen F. Dent<sup>4</sup>, Pierre H. Chapuis<sup>4</sup>, Edouard Nice<sup>5</sup>, Mark S. Baker<sup>1,2\*</sup>

**1** Australian School of Advanced Medicine, Macquarie University, North Ryde, New South Wales, Australia, **2** Department of Chemistry and Biomolecular Sciences, Macquarie University, North Ryde, New South Wales, Australia, **3** Department of Anatomical Pathology, Concord Hospital, University of Sydney, Sydney, New South Wales, Australia, **4** Department of Colorectal Surgery, Concord Hospital, University of Sydney, Sydney, New South Wales, Australia, **5** Department of Biochemistry and Molecular Biology, Monash University, Clayton, Victoria, Australia

## Abstract

Integrin  $\alpha v \beta 6$  is highly expressed in a range of human cancers and frequently correlates with patient survival. This study examines correlations between  $\alpha v \beta 6$  expression and patient clinico-pathological features in Stage B and Stage C rectal cancer, including overall survival. Expression of  $\alpha v \beta 6$  was measured in 362 Stage B or C rectal cancer tissue samples at the tumour central region, invasive tumour front and adjacent non-neoplastic mucosa using immunohistochemistry. Distribution of  $\alpha v \beta 6$  was found to be significantly higher at the invasive front compared to central regions of the tumour ( $p < 0.001$ ) or adjacent non-neoplastic mucosa ( $p < 0.001$ ) suggesting  $\alpha v \beta 6$  plays a role in tumour cell invasion. However, integrin  $\alpha v \beta 6$  expression was not associated with clinico-pathological features or overall survival indicating it is not an independent prognostic marker differentiating Stage B or C rectal cancer. Previous  $\alpha v \beta 6$  studies have suggested the expression of  $\alpha v \beta 6$  is involved in the earlier stages (i.e. Stages A/B) of tumour progression rather than the later stages (i.e. Stages C/D). However, our study has revealed that in rectal cancer  $\alpha v \beta 6$  expression does not increase between Stages B and C, but may occur earlier, namely before or during Stage B cancer.

**Citation:** Ahn SB, Mohamedali A, Chan C, Fletcher J, Kwun SY, et al. (2014) Correlations between Integrin  $\alpha v \beta 6$  Expression and Clinico-Pathological Features in Stage B and Stage C Rectal Cancer. PLoS ONE 9(5): e97248. doi:10.1371/journal.pone.0097248

**Editor:** Ju-Seog Lee, University of Texas MD Anderson Cancer Center, United States of America

**Received:** November 11, 2013; **Accepted:** April 16, 2014; **Published:** May 12, 2014

**Copyright:** © 2014 Ahn et al. This is an open-access article distributed under the terms of the Creative Commons Attribution License, which permits unrestricted use, distribution, and reproduction in any medium, provided the original author and source are credited.

**Funding:** This work was supported by the Biofocus Research Centre, Macquarie University and grants from NHMRC (1010303) and Cancer Council NSW. The funders had no role in study design, data collection and analysis, decision to publish, or preparation of the manuscript.

**Competing Interests:** The authors have declared that no competing interests exist.

\* E-mail: mark.baker@mq.edu.au

## Introduction

Classification of the severity of colorectal cancer (CRC) is currently based on clinical and histological determination of extent of spread of the tumour. Tumour cells can be localised within the bowel wall (Stage A), extending beyond the muscularis propria (Stage B), or metastasised to lymph nodes (Stage C) or distant organs (Stage D). Five-year CRC survival statistics show a significant reduction in survival between Stage B and C, corresponding to difference in lymph node metastasis [1]. Although clinico-pathological staging is the current gold standard technique for the determination of prognosis, the use of new protein biomarkers expressed or amplified in a Stage-specific manner during progression may increase the precision and reliability of histological determinations. A combination of a sound CRC staging system and presence of prognostic protein biomarkers has been proposed as a more efficacious approach for diagnosis, prognosis and treatment guidance [2].

One recently proposed potential prognostic biomarker is the integrin  $\alpha v \beta 6$ . This protein is highly expressed in many types of cancers and has been suggested to be a prognostic indicator of poor survival in CRC, gastric adenocarcinoma and

cervical squamous carcinoma [3–6]. Integrin  $\alpha v \beta 6$  is a transmembrane receptor composed of non-covalently linked  $\alpha v$  and  $\beta 6$  subunits, where the  $\beta 6$  subunit partners exclusively with  $\alpha v$  and is expressed only in epithelial tissues [7].  $\alpha v \beta 6$  is often concentrated in poorly differentiated tumours proximal to invading cancer margins [8–11]. It has also been identified as an important factor in the “epithelial to mesenchymal transition” (EMT) that is characterised by loss of cell adhesion, repression of E-cadherin and increased cell motility during carcinoma progression [12]. Integrin  $\alpha v \beta 6$  is thought to operate in a complex manner, initiating cell signalling cascades whilst also interacting with key extracellular matrix (ECM) proteins and activating growth signals such as latent transforming growth factor  $\beta 1$  (TGF- $\beta 1$ ), a recognised inducer of EMT [3,13]. In support of this contention, antibody-mediated inhibition of  $\alpha v \beta 6$ -mediated TGF- $\beta 1$  activation suppresses EMT [14]. In addition,  $\alpha v \beta 6$  integrin has been shown to play a vital role in a CRC spheroid EMT model mediated through TGF- $\beta 1$  activation and subsequent migration of cells on interstitial fibronectin [11].

In contrast to most other integrins,  $\alpha v \beta 6$  signals through a unique 12-mer C-terminal cytoplasmic sequence that directly interacts with the extracellular signal-regulated kinase (ERK2) activating the ERK/MAPK pathway that is often highly

**Table 1.** Clinico-pathological features of 362 patients for whom data were available for at least one of the measures of integrin  $\alpha v \beta 6$  expression.

| Variable                                               | Category                       | Number (%) or Median (range) |
|--------------------------------------------------------|--------------------------------|------------------------------|
| Sex                                                    | Male                           | 235 (65)                     |
|                                                        | Female                         | 127 (35)                     |
| Age (years)                                            |                                | 67 (29–94)                   |
| Tumour distance from anal verge (cm)                   |                                | 10.2 (2–19)                  |
| Type of resection                                      | Abdominoperineal excision      | 64 (18)                      |
|                                                        | Hartmann's operation           | 24 (7)                       |
|                                                        | Restorative or other operation | 274 (76)                     |
| Tumour maximum surface dimension (cm)                  |                                | 5.0 (1–19)                   |
| Distal clearance margin (cm)                           |                                | 4.1 (0.01–17)                |
| Histological type of tumour                            | Adenocarcinoma                 | 339 (94)                     |
|                                                        | Mucinous adenocarcinoma        | 21 (5)                       |
|                                                        | Signet ring adenocarcinoma     | 2 (1)                        |
| Direct tumour spread                                   | Confined to submucosa          | 7 (2)                        |
|                                                        | Not beyond muscularis propria  | 24 (7)                       |
|                                                        | Beyond muscularis propria      | 331 (91)                     |
| Number of nodes involved                               | None (N0)                      | 168 (46)                     |
|                                                        | 1–3 nodes (N1)                 | 122 (34)                     |
|                                                        | > 3 nodes (N2)                 | 72 (20)                      |
| Tumour stage                                           | Stage B                        | 168 (46)                     |
|                                                        | Stage C                        | 194 (54)                     |
| Tumour grade                                           | Low                            | 20 (6)                       |
|                                                        | Average                        | 244 (67)                     |
|                                                        | High                           | 98 (27)                      |
| Venous invasion                                        | None                           | 260 (72)                     |
|                                                        | Mural                          | 13 (4)                       |
|                                                        | Extra-mural                    | 69 (19)                      |
|                                                        | Both                           | 20 (6)                       |
| Free serosal surface involved                          | No                             | 342 (95)                     |
|                                                        | Yes                            | 20 (6)                       |
| Adjacent organ or structure infiltrated                | No                             | 353 (98)                     |
|                                                        | Yes                            | 9 (2)                        |
| Preoperative radiotherapy with or without chemotherapy | No                             | 344 (95)                     |
|                                                        | Yes                            | 18 (5)                       |
| Postoperative radiotherapy                             | No                             | 343 (95)                     |
|                                                        | Yes                            | 19 (5)                       |
| Postoperative chemotherapy                             | No                             | 305 (84)                     |
|                                                        | Yes                            | 57 (16)                      |

doi:10.1371/journal.pone.0097248.t001

overexpressed in CRC metastasis [15]. The  $\beta 6 \cdot ERK2$  interaction is also responsible for integrin-mediated matrix metalloproteinase 9 (MMP9) secretion (through MAPK) that allows degradation of ECM, facilitating cell escape [16,17]. In summary,  $\alpha v \beta 6$  is a regulator of metastasis and is found to be overexpressed in many cancer phenotypes. Whilst the body of evidence implicating  $\alpha v \beta 6$  in metastasis is substantial, currently no studies have examined when it becomes overexpressed or whether correlation exists between  $\alpha v \beta 6$  and patient survival in rectal cancer. In this study, we specifically examine immunohistochemical expression of  $\alpha v \beta 6$  in 362 patients with rectal cancer Stage B or C in the central

region of the tumour, the invasive front and adjacent non-neoplastic mucosa.

## Materials and Methods

### Patient cohort

All patients underwent surgical resection for rectal cancer at Concord Hospital, a tertiary referral hospital in Sydney, Australia, between January 1988 and December 2001. All resections were performed by specialist colorectal surgeons following a standardised technique (total anatomical dissection) [18]. The rectum was defined as including the rectosigmoid junction but excluding the

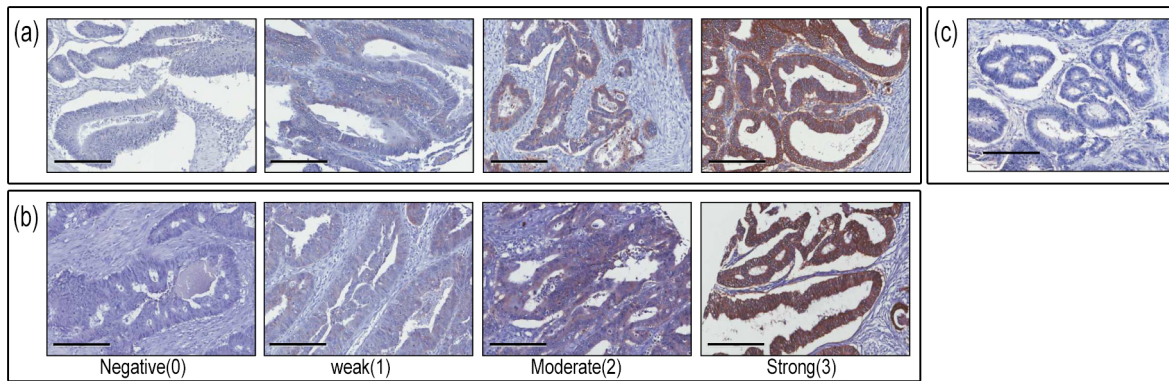

**Figure 1. Integrin  $\alpha\text{v}\beta\text{6}$  staining intensity in rectal cancer Stage B (a) and C (b).** There was no difference in staining patterns within each scored value (0 or 1 or 2 or 3) between rectal cancer Stage B and C tissues. (c): IgG1 negative control. Scale bar: 200  $\mu\text{m}$ . doi:10.1371/journal.pone.0097248.g001

anal canal. Clinical data from the patients were entered into a prospective database initiated in 1971, including information on patient characteristics, comorbidity, presentation, investigations, surgical management, complications, adjuvant therapy, pathology and follow-up [19,20]. The CRC Project at Concord Hospital is carried out under the approval of the South Western Sydney Health Area Ethics Committee (CH62/6/2011-136) with written consents in accordance with the requirements of the NSW Human Tissue Act 1983 and the NHMRC National Statement on Ethical Conduct in Human Research 2007. The study also approved by the Macquarie University Human Ethics Committee (#5201100858). Patients who received neoadjuvant radiotherapy had either short or long course treatment with or without associated chemotherapy. Selection for treatment was based on clinical findings and discussion in a multidiscipline meeting.

### Pathological examination of the resected specimen

Examination of resected specimens followed a standard protocol [1]. Tumour size was measured as the greatest surface dimension. Blocks were taken to demonstrate maximum direct tumour penetration of the bowel wall. Additional blocks were taken specifically to demonstrate the relationship between tumour and any adherent structure or tissue [21] as well as lines of resection and the free serosal surface [22]. Tumour level in the rectum was measured from the anal verge. Venous invasion by the tumour referred to involvement of thick or thin walled veins, either within or beyond the bowel wall. When doubt existed as to whether a structure involved was a vein, a negative finding was recorded. An apical node was defined as the most proximal of any nodes found within 1cm of the ligation of a named vessel at the apex of a vascular pedicle. Tumour grade was assessed taking into account the degree of differentiation and anaplasia, the nature of the tumour margin (pushing or infiltrating) and the presence and

prominence of vascular invasion [19]. All pathological characteristics were analysed in every specimen and presence or absence recorded explicitly, with no missing data on any variable.

Tumours were staged according to the Australian Clinico-Pathological Staging (ACPS) system [1] for CRC which accommodates sub-stages compatible with other clinicopathologic staging systems such as TNM [23]. A potentially curative operation was defined as one where there were no systemic metastases at time of operation and no tumour identified histologically in the proximal, distal or circumferential lines of resection histologically (ACPS Stages A, B, C).

### Tissue microarray construction

Tissue microarrays (TMA) were constructed using an Advanced Tissue Arrayer ATA-100 (Chemicon, Temecula, CA, USA). Cores (1.5 mm) were taken from carefully selected, morphologically representative areas of the original paraffin blocks and arrayed into freshly made recipient paraffin blocks. Cores were taken from the central region of the tumour (avoiding luminal surfaces), the invasive front of the tumour and histologically normal mucosa.

### Immunohistochemistry (IHC)

A murine monoclonal antibody (MAb) against full length human  $\alpha\text{v}\beta\text{6}$  (clone 6.2A1, IgG1) (Biogen Idec, Cambridge, MA, USA) was used in IHC. The specificity of the anti- $\alpha\text{v}\beta\text{6}$  monoclonal antibody 6.2A1 has been reported in several studies [14,24–26]. All TMA sections were prepared and processed simultaneously with the same batch of primary and secondary antibodies and staining reagents, obviating the need to deploy an internal standard. IHC was performed with two different detection amplification systems: an avidin-biotin complex (ABC) and a polymer-based IHC detection system. For ABC IHC, 4  $\mu\text{m}$  paraffin-embedded TMA sections were deparaffinised and

**Table 2. Distribution of  $\alpha\text{v}\beta\text{6}$  expression in central and frontal tumour tissue and in adjacent non-neoplastic mucosa and. Number (%).**

| $\alpha\text{v}\beta\text{6}$ assessment | Number of patients | Negative | Weak    | Intermediate | Strong  |
|------------------------------------------|--------------------|----------|---------|--------------|---------|
| Central tumour tissue                    | 277                | 61 (22)  | 66 (24) | 117 (42)     | 33 (12) |
| Frontal tumour tissue                    | 341                | 47 (14)  | 58 (17) | 156 (46)     | 80 (24) |
| Adjacent non-neoplastic mucosa           | 322                | 80 (25)  | 84 (26) | 145 (45)     | 13 (4)  |

doi:10.1371/journal.pone.0097248.t002

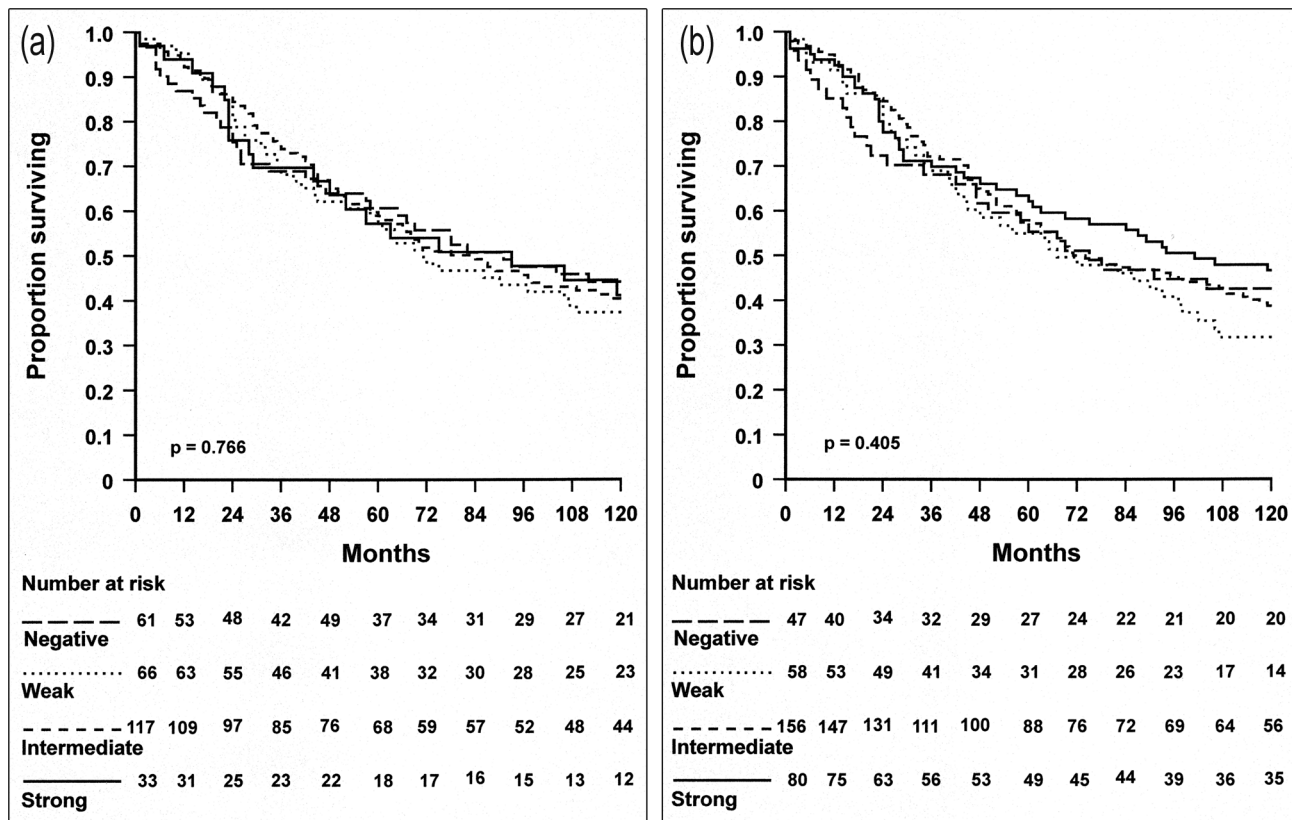

**Figure 2. Kaplan-Meier survival analysis using a Log-rank test.** Overall survival of 362 rectal cancer patients (combined Stage B and C) was not significantly related to central (a) or frontal (b)  $\alpha v \beta 6$  expression. doi:10.1371/journal.pone.0097248.g002

rehydrated, and endogenous peroxidase blocked with 3%  $H_2O_2$  in methanol for 5min. Antigen retrieval was performed using pepsin (DAKO, Carpinteria, CA) at 37°C for 10min. Sections were incubated with horse serum (Vector Laboratories, Burlingame, CA) blocking solution (15  $\mu$ l/ml) in TBS-Tween20 for 20min at room temperature (RT) and then incubated with 0.5 mg/ml anti- $\alpha v \beta 6$  MAb at RT for 60min. Sections were incubated with biotinylated anti-mouse IgG (Vector Laboratories) for 20min at RT and incubated with Elite ABC reagent (Vector Laboratories) for 20min at RT. Between each incubation, TBS washing was performed twice. 3,3'-diaminobenzidine substrate in 0.05 M Tris-HCL (pH 7.4) was applied for 5min and intensity enhanced by incubating sections in  $CuSO_4$  for 5min. Cell nuclei were counterstained with Mayer's Hematoxylin (Sigma, St. Louis, MO). Polymer-based IHC performed on a Bond-Max Autostainer (Leica Microsystems, Bannockburn, IL) as described [27], except that antigen retrieval was performed with pepsin and 6.2A1 anti- $\alpha v \beta 6$  MAb (0.5  $\mu$ g/ml) used as a primary antibody. Isotype IgG1 (R&D Systems, Minneapolis, USA) was used as a negative control.

#### IHC evaluation

Immunoreactivity for  $\alpha v \beta 6$  was evaluated by two assessors independently (SBA, CC), with 100% agreement, who were blinded to patient's clinico-pathological status. Staining intensities were scored separately for central region, invasive tumour front and normal mucosa and scored as 0=no staining, 1=weak staining, 2=intermediate staining and 3=strong staining. If staining intensity was heterogeneous in any single tissue core, the predominant staining intensity was recorded.

#### Outcome variable and patient follow-up

The outcome of overall survival time was measured from date of surgical resection to date of death due to any cause, with times censored for patients lost to follow-up or who remained alive at the close of the study. Patients were followed annually until death or to December 31, 2011. Details of the follow-up protocol have been described previously [18].

#### Statistical Analysis

The chi-squared test or Fisher's exact test were used to examine the statistical significance of differences in proportions. The Wilcoxon matched pairs signed ranks test was used to compare the frequency distributions of  $\alpha v \beta 6$  expression between the central tumour, frontal tumour and normal mucosa. Comparisons of survival time between strata of  $\alpha v \beta 6$  expression and covariates were made with the Kaplan-Meier method and log-rank test and also Cox regression and Wald p. Continuous and multi-category covariates were dichotomised at conventional or otherwise appropriate cutting points. As clinico-pathological stage is the strongest known predictor of prognosis, associations with survival were examined for Stage B and C separately as well as for the two stages combined, in order to identify any differences in effects of  $\alpha v \beta 6$  between stages. The level for two-tailed statistical significance was  $p \leq 0.05$  with confidence intervals (CI) at the 95% level. Analyses were performed with SPSS version 20 (IBM Australia Limited).

**Table 3.** Association between integrin  $\alpha$ v $\beta$ 6 central and frontal expression in Stage B and C tumours.

| $\alpha$ v $\beta$ 6 site | Stage       | Number of patients | Negative | Weak | Intermediate | Strong | Chi <sup>2</sup> for B vs. C | Hazard ratio (95%CI) | Wald p |
|---------------------------|-------------|--------------------|----------|------|--------------|--------|------------------------------|----------------------|--------|
| Central                   | Stage B & C | 277                | 61       | 66   | 117          | 33     | 0.432                        | 1.0 (0.9–1.2)        | 0.660  |
|                           | Stage B     | 125                | 30       | 34   | 47           | 14     | —                            | 1.0 (0.8–1.2)        | 0.709  |
|                           | Stage C     | 152                | 31       | 32   | 70           | 19     | —                            | 1.1 (0.9–1.3)        | 0.525  |
| Frontal                   | Stage B & C | 341                | 47       | 58   | 156          | 43     | 0.736                        | 1.0 (0.8–1.1)        | 0.503  |
|                           | Stage B     | 165                | 26       | 29   | 73           | 37     | —                            | 1.0 (0.8–1.2)        | 0.808  |
|                           | Stage C     | 176                | 21       | 29   | 83           | 43     | —                            | 0.9 (0.8–1.1)        | 0.370  |

Association between overall survival and  $\alpha$ v $\beta$ 6 central and frontal expression in Stage B and C combined and in Stage B and C separately.  
doi:10.1371/journal.pone.0097248.t003

## Results

From the 1,804 Concord Hospital CRC resections between January 1988 and December 2001, patients were excluded in the following sequence: those patients with colon cancer (1,022), previous CRC (20), inflammatory bowel disease or *polyposis coli* (9), a first degree relative with CRC (65) and Stage A or D tumour (289), leaving 399 patients potentially available for assessment of  $\alpha$ v $\beta$ 6 in this study. However, 37 of these patients had insufficient archival tissue available for assessment, leaving 362 who were assessable. Varying numbers of these had an uninformative result for one or more of the  $\alpha$ v $\beta$ 6 assessments (indicated where appropriate in subsequent tables). On comparing the 362 patients who had a result on one or more of the  $\alpha$ v $\beta$ 6 assessments with the 37 who could not be assessed, there were no material differences over the range of clinico-pathological variables examined. Thus the 362 patients assessed appeared to be representative of the total pool of 399 patients from which they were drawn. The clinico-pathological characteristics of these 362 patients are shown in Table 1.

### Expression of integrin $\alpha$ v $\beta$ 6 in Stage B and C rectal cancer tissue samples

In order to compare distribution of  $\alpha$ v $\beta$ 6 staining intensity between central, frontal rectal cancer and histologically normal epithelial tissue, and because of the varying numbers of patients with informative results on each assessment, a Wilcoxon matched pairs signed ranks test was performed in patients who had an informative result on both assessments of each pair. The distribution of  $\alpha$ v $\beta$ 6 staining intensity was significantly higher in the frontal compared to central tissue ( $n = 259$ ,  $p < 0.001$ ); significantly higher in the frontal compared to normal tissue ( $n = 302$ ,  $p < 0.001$ ); and slightly higher in the central compared to apparently normal mucosa ( $n = 253$ ,  $p = 0.049$ ) (Table 2). The intensities of  $\alpha$ v $\beta$ 6 expression between the rectal cancer Stage B and C tissues showed no difference within each scored value (Figure 1). Non-specific binding was examined using relevant isotype control MAbs and was shown in all cases to be inconsequential.

### Follow up detail

In 110 (30.4%) patients who had not died, survival time ranged from 103 months to 245 months with a median of 171 months. In 243 (67.1%) patients who had died, survival time ranged from 2 days to 243 months with a median of 45 months. In 9 (2.5%) patients who were lost, follow-up time ranged from 3 to 178 months with a median of 51 months.

### Expression of $\alpha$ v $\beta$ 6 and patients survival

Kaplan-Meier survival plots demonstrated that overall survival was not significantly related to either central or frontal  $\alpha$ v $\beta$ 6 expression, either for Stage B and C combined or separately (Figure 2 and Table 3).

### Expression of $\alpha$ v $\beta$ 6 and clinico-pathological features

The assessment of correlation between integrin  $\alpha$ v $\beta$ 6 expression and clinico-pathological features indicated that  $\alpha$ v $\beta$ 6 expression was not associated with any clinico-pathological feature (Table 3).

### Clinico-pathological features of Stage B and C rectal cancer patient

Overall survival was significantly diminished in patients aged 75 years or older, those who had a Hartmann's operation, those



**Table 4.** Association between clinico-pathological features and overall survival in 362 patients for whom data were available on at least one of the measures of  $\alpha v \beta 6$  expression.

| Variable                        | Patients | Deaths | Hazard ratio (95% CI) | Wald p |
|---------------------------------|----------|--------|-----------------------|--------|
| Male                            | 235      | 154    | 0.9 (0.7–1.2)         | 0.693  |
| Female                          | 127      | 89     |                       |        |
| Age $\geq$ 75 years             | 98       | 82     | 1.8 (1.4–2.4)         | <0.001 |
| No                              | 264      | 161    |                       |        |
| Tumour level $\leq$ 6 cm        | 84       | 51     | 0.8 (0.6–1.1)         | 0.211  |
| No                              | 278      | 192    |                       |        |
| Hartmann's operation            | 24       | 23     | 2.7 (1.7–4.1)         | <0.001 |
| No                              | 338      | 220    |                       |        |
| Tumour size $\geq$ 5 cm         | 178      | 116    | 0.9 (0.7–1.2)         | 0.676  |
| No                              | 184      | 127    |                       |        |
| Distal margin < 2 cm            | 37       | 27     | 1.1 (0.7–1.6)         | 0.696  |
| No                              | 325      | 216    |                       |        |
| Spread past MP                  | 331      | 223    | 1.2 (0.8–1.9)         | 0.463  |
| No                              | 31       | 20     |                       |        |
| Mucinous, signet ring           | 23       | 15     | 1.5 (1.2–2.0)         | 0.003  |
| No                              | 339      | 228    |                       |        |
| Apical node involved            | 12       | 10     | 2.8 (1.5–5.3)         | 0.001  |
| No                              | 350      | 233    |                       |        |
| $\geq$ 4 nodes involved         | 72       | 57     | 1.8 (1.3–2.4)         | <0.001 |
| No                              | 290      | 186    |                       |        |
| Stage C                         | 194      | 141    | 1.5 (1.2–2.0)         | <0.001 |
| Stage B                         | 168      | 102    |                       |        |
| High grade                      | 98       | 70     | 1.5 (1.2–2.0)         | 0.003  |
| No                              | 264      | 173    |                       |        |
| Venous invasion                 | 102      | 78     | 1.7 (1.3–2.2)         | <0.001 |
| No                              | 260      | 165    |                       |        |
| To free serosal surface         | 20       | 13     | 1.1 (0.6–2.0)         | 0.663  |
| No                              | 342      | 230    |                       |        |
| To adjacent organ or structure  | 9        | 9      | 3.0 (1.5–5.8)         | 0.001  |
| No                              | 353      | 234    |                       |        |
| Preoperative radio/chemotherapy | 18       | 16     | 1.5 (0.9–2.6)         | 0.090  |
| No                              | 344      | 227    |                       |        |
| Postoperative radiotherapy      | 19       | 15     | 1.4 (0.8–2.3)         | 0.252  |
| No                              | 343      | 228    |                       |        |
| Postoperative chemotherapy      | 57       | 29     | 0.7 (0.5–0.99)        | 0.042  |
| No                              | 305      | 214    |                       |        |

doi:10.1371/journal.pone.0097248.t004

with mucinous or signet ring tumours, when an apical lymph node was involved, when  $\geq 4$  nodes were involved, those with Stage C tumour, in high grade tumours, in the presence of venous invasion, when an adjacent organ or structure had been infiltrated by tumour, and in patients who did not receive adjuvant chemotherapy. Association between clinico-pathological features and overall survival in the 362 patients is presented in Table 4.

#### Detection of $\alpha v \beta 6$ using polymer-based IHC

Polymer-based IHC was performed solely to detect  $\alpha v \beta 6$  missed by ABC IHC test. This was an investigative tool to determine only  $\alpha v \beta 6$  staining intensity and was not used to gauge patient survival. A comparison of distributions of integrin  $\alpha v \beta 6$  staining intensities

of the two IHC techniques demonstrated that  $\alpha v \beta 6$  expression using the polymer based IHC occurred in more than 90% of all patients' tissues in all assessments (Table 5).

#### Discussion

In this study, we demonstrate that distribution of integrin  $\alpha v \beta 6$  expression was significantly higher in the invasive front of the tumour compared to the central region of the tumour ( $p < 0.001$ ) or histologically normal mucosa ( $p < 0.001$ ) in 362 rectal cancers Stage B and C. However, clinico-pathological features and overall survival were not statistically associated with integrin  $\alpha v \beta 6$  expression. This observation contrasts with previous reports

**Table 5.** A comparison of distribution of integrin  $\alpha v \beta 6$  staining intensities between polymer-based and avidin-biotin complex (ABC) IHCs in adjacent non-neoplastic mucosa and in central and frontal tumour tissue.

|              | Central tumour tissue       |                   | Frontal tumour tissue       |                   | Adjacent non-neoplastic mucosa |                   |
|--------------|-----------------------------|-------------------|-----------------------------|-------------------|--------------------------------|-------------------|
|              | Polymer based IHC (n = 274) | ABC IHC (n = 274) | Polymer based IHC (n = 337) | ABC IHC (n = 337) | Polymer based IHC (n = 319)    | ABC IHC (n = 319) |
| None         | 23 (8.4)                    | 60 (21.9)         | 16 (4.7)                    | 45 (13.4)         | 3 (0.9)                        | 79 (24.8)         |
| Weak         | 26 (9.5)                    | 65 (23.7)         | 12 (3.6)                    | 58 (17.2)         | 16 (5.0)                       | 84 (26.3)         |
| Intermediate | 126 (46.0)                  | 116 (42.3)        | 131 (38.9)                  | 155 (46.0)        | 133 (41.7)                     | 143 (44.8)        |
| Strong       | 99 (36.1)                   | 33 (12.0)         | 178 (52.8)                  | 79 (23.4)         | 167 (52.4)                     | 13 (4.1)          |

Number (%).

doi:10.1371/journal.pone.0097248.t005

suggesting that  $\alpha v \beta 6$  expression is often associated with poor survival in various cancers [3,6,11,26,28]. However, the other  $\alpha v \beta 6$  studies were carried out on tumours across multiple Stages (i.e., Stages A to D) whereas our study focused only on Stage B and C and for the first time exclusively on rectal cancer samples.

CRC is a devastating disease whose protein molecular biosignatures are slowly being explored. An understanding and detection of these may help timely diagnosis, prognosis and treatment of CRC [2]. It is well known that metastasis is the major cause of mortality and a leading cause of the failure of anti-cancer therapies [29]. Indeed, it is established that a phenotypic histologically observable shift from a non-metastatic (Stage B) to nodal metastatic (Stage C) is correlated with poor survival [1]. At a molecular level, the switch of cancer cells from an epithelial to a mesenchymal phenotype is coupled with degradation of ECM and other pivotal biological processes that facilitate metastasis. Key regulators that may modulate these biological processes are loss of E-cadherin, activation of TGF- $\beta 1$ , increases in proteolytic systems, like MMPs, urokinase plasminogen activator (uPA) and the uPA receptor (uPAR) [13,30]. Importantly, integrin  $\alpha v \beta 6$  is strongly associated with many of the processes these regulators act upon, including the MAPK pathway, one of the primary signalling pathways implicated in transformation, proliferation, invasion and metastasis of CRC [3,31]. For example,  $\alpha v \beta 6$  activates TGF- $\beta 1$  by releasing this protein from an inactive complex [3]. It is not surprising therefore, that  $\alpha v \beta 6$  is overexpressed primarily in proliferating epithelial cells where it activates and promotes “drivers” of metastasis. Our recent unpublished work suggest that  $\alpha v \beta 6$  interacts with other proteins, found up-regulated in CRC (e.g., uPAR), and this has now been confirmed by proximity ligation assay and peptide array. It is not known if interaction with other molecules may modulate the biology of  $\alpha v \beta 6$  given that uPAR is a multi-functional cell surface receptor involved in both ECM degradation and cellular signalling [32], as well as being a poor prognostic factor of CRC survival [33].

Not only do our results recapitulate previous studies demonstrating  $\alpha v \beta 6$  expression in proliferating epithelial cells, but they confirm that  $\alpha v \beta 6$  is epithelial-restricted in rectal cancer. Previous studies demonstrated that  $\alpha v \beta 6$  expression was concentrated at the invading edge of ovarian tumour and oral squamous cell carcinomas [8,9,34]. Our results confirm that  $\alpha v \beta 6$  is also more highly expressed at the invasive front in rectal cancer than in central regions of rectal tumours and/or normal mucosa suggesting  $\alpha v \beta 6$  plays crucial roles in tumour cell invasion.

This study focussed on delineating if in rectal cancer expression of  $\alpha v \beta 6$  could be a marker of a tumour’s transition from Stage B to Stage C. Two IHC staining protocols were undertaken and the data from ABC-based IHC confirmed that integrin  $\alpha v \beta 6$  was not

an independent prognostic marker in these two stages, nor was it correlated with any clinico-pathological feature studied. This result was contrary to expectations because  $\alpha v \beta 6$  has previously had a positive correlation with patient survival in a range of cancers. Specifically,  $\alpha v \beta 6$  has been identified as a prognostic indicator of poor survival in CRC [11], gastric adenocarcinoma [6,26] and cervical squamous carcinoma [28], where the CRC and gastric carcinoma studies were based on tumour Stage I through IV and the cervical squamous carcinoma was on patients identified as FIGO Stage IA through IIB (equivalent to TMN Stage I–II). From that CRC study (n = 488) [11], Kaplan-Meier plots demonstrated that  $\alpha v \beta 6$  was strongly associated with survival in early stage tumours (Stage I–II) but not for the later stage tumours (Stage III–IV). Similarly, a study of 300 gastric carcinoma patients [26] revealed that  $\alpha v \beta 6$  was a potential risk factor in both early (Stage I–II) and late stage (Stage III–IV), with survival more significantly associated in earlier than later stage. A recent gastric carcinoma study (n = 51) [6] also demonstrated  $\alpha v \beta 6$  was a poor prognostic factor but survival was not significantly associated with stage. Moreover, the cervical study (n = 85) [28] indicated  $\alpha v \beta 6$  is an unfavourable prognostic factor in patients between FIGO Stage IA2-IB1 and IB2-IIB. Overall, the expression of  $\alpha v \beta 6$  is suggested to be involved in the earlier stages of tumour progression rather than the later stages, however our data has reveals that the  $\alpha v \beta 6$  expression does not increase between rectal cancer Stages B and C, but may occur earlier.

In addition, comparison of two alternative staining protocols (polymer-based versus an ABC IHC method) showed the more sensitive polymer-based amplification method detected  $\alpha v \beta 6$  expression in almost all (>90%) rectal cancer Stage B and C tissues. These data also supports that the  $\alpha v \beta 6$  expression may occur earlier than anticipated in CRC progression, namely before or during Stage B cancer.

Previous studies found  $\alpha v \beta 6$  expression is low or undetectable in normal adult epithelia, but is highly expressed during wound healing and/or cancer [3,8,34], potentially explaining why  $\alpha v \beta 6$  is being explored as an interesting target for cancer imaging and therapy [35]. Here,  $\alpha v \beta 6$  was observed in almost all histological normal rectal mucosa less than 1–2 cm from the tumour margin (i.e., adjacent non-neoplastic mucosa, suggesting that EMT-associated changes are occurring in that tissue). The observation that apparently adjacent non-neoplastic mucosa expresses other antigens involved in cancer progression (e.g., EMT) is supported by a study demonstrating EMT markers ( $\alpha$ -smooth muscle actin & SNAIL) and EMT-inducers (MMP2 & TGF- $\beta 3$ ) are extensively expressed in histologically normal tissues proximal to breast tumour margins (i.e., = 1 cm away) whilst being only sparsely expressed at a distance of 5 cm from the same tumour margins

[36]. This study closely aligns with our current observations of  $\alpha\beta6$  being expressed within 1 cm of rectal cancer margins, as  $\alpha\beta6$  is also known to be involved in the EMT [14].

In conclusion, integrin  $\alpha\beta6$  is more frequently expressed at the invasive front of rectal cancer. While it likely plays an important role in tumour progression, this integrin does not act as an independent prognostic marker in rectal cancer Stage B and C. Further studies are needed to delineate proteins differentially expressed in different stages of rectal cancer.

## References

- Davis NC, Newland RC (1983) Terminology and classification of colorectal adenocarcinoma: the Australian clinico-pathological staging system. *Aust N Z J Surg* 53: 211–221.
- Ludwig JA, Weinstein JN (2005) Biomarkers in cancer staging, prognosis and treatment selection. *Nat Rev Cancer* 5: 845–856.
- Bandyopadhyay A, Raghavan S (2009) Defining the role of integrin alphabeta6 in cancer. *Curr Drug Targets* 10: 645–652.
- Patsenker E, Wilkens L, Banz V, Osterreicher CH, Weimann R, et al. (2010) The alphabeta6 integrin is a highly specific immunohistochemical marker for cholangiocarcinoma. *J Hepatol* 52: 362–369.
- Liu S, Liang B, Gao H, Zhang F, Wang B, et al. (2013) Integrin alphabeta6 as a novel marker for diagnosis and metastatic potential of thyroid carcinoma. *Head Neck Oncol* 5: 7.
- Zhuang Z, Zhou R, Xu X, Tian T, Liu Y, et al. (2013) Clinical significance of integrin alphabeta6 expression effects on gastric carcinoma invasiveness and progression via cancer-associated fibroblasts. *Med Oncol* 30: 013–0580.
- Hynes RO (2002) Integrins: bidirectional, allosteric signaling machines. *Cell* 110: 673–687.
- Ahmed N, Riley C, Rice GE, Quinn MA, Baker MS (2002) Alpha(v)beta(6) integrin-A marker for the malignant potential of epithelial ovarian cancer. *J Histochem Cytochem* 50: 1371–1380.
- Jones J, Watt FM, Speight PM (1997) Changes in the expression of alpha v integrins in oral squamous cell carcinomas. *J Oral Pathol Med* 26: 63–68.
- Sipos B, Hahn D, Carceller A, Piulats J, Hedderich J, et al. (2004) Immunohistochemical screening for beta6-integrin subunit expression in adenocarcinomas using a novel monoclonal antibody reveals strong up-regulation in pancreatic ductal adenocarcinomas in vivo and in vitro. *Histopathology* 45: 226–236.
- Bates RC, Bellovin DI, Brown C, Maynard E, Wu B, et al. (2005) Transcriptional activation of integrin beta6 during the epithelial-mesenchymal transition defines a novel prognostic indicator of aggressive colon carcinoma. *J Clin Invest* 115: 339–347.
- Kalluri R, Weinberg RA (2009) The basics of epithelial-mesenchymal transition. *J Clin Invest* 119: 1420–1428.
- Xu J, Lamouille S, Derynck R (2009) TGF-beta-induced epithelial to mesenchymal transition. *Cell Res* 19: 156–172.
- Van Aarsen LA, Leone DR, Ho S, Dolinski BM, McCoon PE, et al. (2008) Antibody-mediated blockade of integrin alpha v beta 6 inhibits tumor progression in vivo by a transforming growth factor-beta-regulated mechanism. *Cancer Res* 68: 561–570.
- Ahmed N, Niu J, Dorahy DJ, Gu X, Andrews S, et al. (2002) Direct integrin alphabeta6-ERK binding: implications for tumour growth. *Oncogene* 21: 1370–1380.
- Gu X, Niu J, Dorahy DJ, Scott R, Agrez MV (2002) Integrin alpha(v)beta6-associated ERK2 mediates MMP-9 secretion in colon cancer cells. *Br J Cancer* 87: 348–351.
- Morgan MR, Thomas GJ, Russell A, Hart IR, Marshall JF (2004) The integrin cytoplasmic-tail motif EKQKVDLSTDC is sufficient to promote tumor cell invasion mediated by matrix metalloproteinase (MMP)-2 or MMP-9. *J Biol Chem* 279: 26533–26539.
- Bokey EL, Ojerskog B, Chapuis PH, Dent OF, Newland RC, et al. (1999) Local recurrence after curative excision of the rectum for cancer without adjuvant therapy: role of total anatomical dissection. *Br J Surg* 86: 1164–1170.
- Newland RC, Chapuis PH, Pheils MT, MacPherson JG (1981) The relationship of survival to staging and grading of colorectal carcinoma: a prospective study of 503 cases. *Cancer* 47: 1424–1429.
- Newland RC, Chapuis PH, Smyth EJ (1987) The prognostic value of substaging colorectal carcinoma. A prospective study of 1117 cases with standardized pathology. *Cancer* 60: 852–857.
- Darakshian A, Lin BP, Chan C, Chapuis PH, Dent OF, et al. (2008) Correlates and outcomes of tumor adherence in resected colonic and rectal cancers. *Ann Surg* 247: 650–658.
- Keshava A, Chapuis PH, Chan C, Lin BP, Bokey EL, et al. (2007) The significance of involvement of a free serosal surface for recurrence and survival following resection of clinicopathological stage B and C rectal cancer. *Colorectal Dis* 9: 609–618.
- Fielding LP, Arsenault PA, Chapuis PH, Dent O, Gathright B, et al. (1991) Clinicopathological staging for colorectal cancer: an International Documentation System (IDS) and an International Comprehensive Anatomical Terminology (ICAT). *J Gastroenterol Hepatol* 6: 325–344.
- Hecht JL, Dolinski BM, Gardner HA, Violette SM, Weinreb PH (2008) Overexpression of the alphabeta6 integrin in endometrial cancer. *Appl Immunohistochem Mol Morphol* 16: 543–547.
- Weinreb PH, Simon KJ, Rayhorn P, Yang WJ, Leone DR, et al. (2004) Function-blocking integrin alphabeta6 monoclonal antibodies: distinct ligand-mimetic and nonligand-mimetic classes. *J Biol Chem* 279: 17875–17887.
- Zhang ZY, Xu KS, Wang JS, Yang GY, Wang W, et al. (2008) Integrin alphavbeta6 acts as a prognostic indicator in gastric carcinoma. *Clin Oncol* 20: 61–66.
- Kho PS, Jankova L, Fung CL, Chan C, Clarke C, et al. (2012) Overexpression of protein S100A4 is independently associated with overall survival in stage C colonic cancer but only in cytoplasm at the advancing tumour front. *Int J Colorectal Dis* 27: 1409–1417.
- Hazellbag S, Kenter GG, Gorter A, Dreef EJ, Koopman LA, et al. (2007) Overexpression of the alpha v beta 6 integrin in cervical squamous cell carcinoma is a prognostic factor for decreased survival. *J Pathol* 212: 316–324.
- Jemal A, Bray F, Center MM, Ferlay J, Ward E, et al. (2011) Global cancer statistics. *CA: A Cancer Journal for Clinicians* 61: 69–90.
- Pepper MS (2001) Role of the matrix metalloproteinase and plasminogen activator-plasmin systems in angiogenesis. *Arterioscler Thromb Vasc Biol* 21: 1104–1117.
- Dhillon AS, Hagan S, Rath O, Kolch W (2007) MAP kinase signalling pathways in cancer. *Oncogene* 26: 3279–3290.
- Smith HW, Marshall CJ (2010) Regulation of cell signalling by uPAR. *Nat Rev Mol Cell Biol* 11: 23–36.
- Mekkawy AH, Morris DL, Pourgholami MH (2009) Urokinase plasminogen activator system as a potential target for cancer therapy. *Future Oncol* 5: 1487–1499.
- Bruss JM, Gallo J, DeLisser HM, Klimanskaya IV, Folkesson HG, et al. (1995) Expression of the beta 6 integrin subunit in development, neoplasia and tissue repair suggests a role in epithelial remodeling. *J Cell Sci* 108: 2241–2251.
- Saha A, Ellison D, Thomas GJ, Vallath S, Mather SJ, et al. (2010) High-resolution in vivo imaging of breast cancer by targeting the pro-invasive integrin alphabeta6. *J Pathol* 222: 52–63.
- Trujillo KA, Heaphy CM, Mai M, Vargas KM, Jones AC, et al. (2011) Markers of fibrosis and epithelial to mesenchymal transition demonstrate field cancerization in histologically normal tissue adjacent to breast tumors. *Int J Cancer* 129: 1310–1321.

## Acknowledgments

The authors thank Paul H. Weinreb and Sheila M. Violette, from Biogen Idec Inc., Cambridge Center, Cambridge, MA 02142, USA for kindly providing the 6.2A1 antibody against the integrin  $\alpha\beta6$ .

## Author Contributions

Conceived and designed the experiments: MB EN SBA. Performed the experiments: SBA C. Chan SYK C. Clarke. Analyzed the data: OD C. Chan SBA MB. Contributed reagents/materials/analysis tools: PC C. Chan JF MB. Wrote the paper: SBA OD AM MB EN.
